# Supplementary material
Source: Research Square preprint supplement (doi:10.21203/rs.3.rs-9669594/v1)
Supplement: Supplementary file 1 [file 5247a4d30e14bf3b7ce72568.docx]

**Supplementary Table 1.** Representative pathogenic and likely pathogenic variants identified by whole-exome sequencing (WES)

| **Case ID** | **Gene** | **Variant** | **Protein** | **MOI** | **ACMG classificationa** | **AAO** | **Seizure type** | **Parental origin** | **Seizure-free** | **Current medications** | **Past medications** | **Previous publications (PMID)** |
| --- | --- | --- | --- | --- | --- | --- | --- | --- | --- | --- | --- | --- |
| 1 | *SCN1A*  NM_001165963.4 | c.1118dup | p.Leu373Phefs*77 | AD | PVS1, PM2, PP4 | 5 mo | GTC, MS, MA, FTS | — | N | CLB (R), LEV (UR), VPA (R), KTD (PR) | CBZ (UR), PHB (UR), PNL (R) | — |
| 2 | *NPC1*  NM_000271.5 | c.43_44del  c.3812_3813del | p.Leu15Valfs*42  p.Glu1271Alafs*64 | AR | PVS1, PM2, PM3, PP4  PVS1, PM2, PM3, PP4 | 9 y | GT, FTS | Paternal  Maternal | N | CBZ (UR), LEV (PR) | PHT (SE), TPM (PR), VPA (PR) | — |
| 3 | *DHDDS*  NM_205861.3 | c.632G>A | p.Arg211Gln | AD | PS2, PM2, PP3 | 6 y | FTS, GTC, MS | *De novo* | Y | VPA (R) | — | 29100083, 33798445, 35719373 |
| 4 | *MECP2* NM_001110792.2 | c.509C>T | p.Thr170Met | XD | PS2, PM1, PM2, PP3 | 8 mo | GT | — | Y | TPM (R), VPA (R) | PHT (SE) | 23810759 |
| 9 | *GLUL*  NM_001033044.4 | c.604_606dup | p.Trp202dup | AD | PS2, PM2, PM4 | 1 y | FTS, GTC | *De novo* | N | PHB (R), TPM (R) | LEV (UR), VPA (SE) | **—** |
| 10 | *STXBP1* NM_001032221.6 | c.1651C>T | p.Arg551Cys | AD | PS2, PM1, PM2, PP2, PP3 | 7 mo | GTC, FTS | — | N | CLZ (PR), LEV (R), TPM (R), VPA (R) | PHB (SE), PHT (A) | 27069701 |
| 11 | *ASXL3*  NM_030632.3 | c.253G>T | p.Glu85* | AD | PVS1, PM2 | 11 mo | GTC, GT, MS | — | N | CLB (R) | VPA (SE) | **—** |
| 13 | *ZBTB18*  NM_205768.3 | c.1378C>T | p.His460Tyr | AD | PS2, PM1, PM2, PP2 | 2 mo | ES, GT, FTS | *De novo* | N | CBZ (A), CLZ (R), LEV (R), VPA (R), LTG (UR), | CLB (UR), PNL (UR), TPM (UR), ZNS (UR), KTD (UR) | 38215144 |
| 14 | *KCNA2*  NM_004974.4 | c.1220C>T | p.Pro407Leu | AD | PS2, PM1, PM2, PP2_Supporting, PP3 | 1 mo | GT, FTS | — | Y | CBZ (R), LEV (PR), PHT (R) | PHB (UR), VPA (UR) | 39310880 |
| 16 | *ATP1A3*  NM_152296.5 | c.2452G>A | p.Glu818Lys | AD | PS2, PM1, PM2, PP2, PP3_Strong | 1 y 5 mo | GT | — | Y | LEV (R) | — | 29625811 |
| 18 | *GABRG2*  NM_198904.4 | c.1081del | p.Ser361Alafs*39 | AD | PVS1_Strong, PM2 | 7 mo | GTC | Paternal | N | CBZ (R), VPA (R) | PHB (UR) | **—** |
| 19 | *MECP2* NM_001110792.2 | c.437C>G | p.Ser146Cys | XD | PS2, PS3, PM1, PM2, PP3_Strong | 3 mo | GT, AS, FTS | — | N | LEV (PR), VPA (R), LTG (R) | — | 35809380, 15635068, 21831886, 26418480 |
| 20 | *BRAF*  NM_004333.6 | c.1695T>G | p.Asp565Glu | AD | PS1, PS2, PM1, PM2, PP2, PP3 | 1 d | MS | — | Y | PER (R), PHB (UR), VPA (UR) | — | 34573299 |
| 21 | *SCN1A*  NM_001165963.4 | c.3880-1G>T | p.? | AD | PVS1, PM2 | 7 mo | FTS | — | N | CLZ (R), LEV (R), LTG | CBZ (A), PHB (UR), PHT (A), TPM (UR), VPA (UR) | **—** |
| 26 | *KCNQ2*  NM_172107.4 | c.637C>T | p.Arg213Trp | AD | PS2, PM1, PM2, PP2, PP3 | 2 d | GT | — | Y | PHB (PR), PHT (R) | — | 25959266, 27779742 |
| 27 | *SCN1A*  NM_001165963.4 | c.302G>A | p.Arg101Gln | AD | PS2, PM1, PM2, PP2, PP3 | 5 mo | GT, GTC | — | N | CLZ (R), PHB (UR), TPM (R), VPA (R) | PHT (A) | 24328833, 22071555 |
| 30 | *CLCN4*  NM_001830.4 | c.2044G>T | p.Glu682* | XD | PVS1, PM2 | 19 d | GTC, MS, FTS | Maternal | N | PHB (R, SE), TPM (R), VPA (R, SE), LTG (R) | CLB (PR), LEV (UR), PHT (PR) | — |
| 32 | *GABRB2* NM_001371727.1 | c.221T>G | p.Val74Gly | AD | PS2, PM1, PM2, PP2, PP3_Moderate | 3 mo | ES | *De novo* | Y |  | PNL (R), TPM (R), VGB (SE) | — |
| 33 | *UBE3A*  NM_130839.5 | c.2567_2570del | p.Lys856Argfs*4 | AD | PVS1_Strong, PS2, PM2 | 3 y | GTC | *De novo* | − | VPA (R) | — | 19213023, 36011358 |
| 37 | *FGF12*  NM_004113.6 | c.155G>A | p.Arg52His | AD | PS3, PS2, PM2, PP3_Strong | 4 d | GT, GTC, | — | Y | CBZ (R), CLB (R), LEV (R), TPM (R) | PHB (R) | 27164707, 27164707, 29699863, 29652076 |
| 38 | *ASS1*  NM_054012.4 | c.1087C>T  c.773+3G>T | p.Arg363Trp  p.? | AR | PM1, PM2, PP3_Moderate, PM3, PM5  PM2, PM3_Strong, PP4 | 3 d | GTC | Maternal  Paternal | Y | LEV (R), TPM (R) | CLZ (R), PHT (SE) | **—** |
| 42 | *MECP2* NM_001110792.2 | c.799C>T | p.Arg267* | XD | PVS1_Strong, PM6, PM2 | 2 y 6 mo | GT, FTS | — | N | CBZ (R), VPA (R) | — | 21982064, 23810759, 17089071, 22476991, 22277191, 20031356 |
| 43 | *TPP1*  NM_000391.4 | c.622C>T | p.Arg208* | AR  (Homozygous) | PVS1, PM2, PM3_Supporting | 3 y | GTC, MS | Parental | N | LEV (R), VPA (R) | — | — |
| 46 | *SCN2A*  NM_001040142.2 | c.2017-2del | p.? | AD | PVS1_Moderate, PS2, PM2 | 10 y | FTS, GTC, GT | *De novo* | N | CLB (UR), LEV (R), TPM (R), VPA (UR), LTG (R) | CLZ (SE) | — |
| 49 | *EFTUD2*  NM_004247.4 | c.2760dup | p.Glu922Glyfs*19 | AD | PVS1, PM2, PP4 | 1 y 4 mo | FTS, GT | — | Y | PHB (R), TPM (R) | — | — |
| **SUPPLEMENTARY TABLE 1 (CONTINUED)** REPRESENTATIVE PATHOGENIC AND LIKELY PATHOGENIC VARIANTS IDENTIFIED BY WHOLE EXOME SEQUENCING (WES) | | | | | | | | | | | | |

| **Case ID** | **Gene** | **Variant** | **Protein** | **MOI** | **ACMG classificationa** | **AAO** | **Seizure type** | **Inheritance pattern** | **Seizure free** | **Current medications** | **Past medications** | **Previous publication (PMID)** |
| --- | --- | --- | --- | --- | --- | --- | --- | --- | --- | --- | --- | --- |

| 51 | *KCNQ2*  NM_172107.4 | c.836G>A | p.Gly279Asp | AD | PS2, PM1, PM2, PP2, PP3 | 1 d | GT, Other | — | N | PHB (UR), TPM (PR) | LEV (UR), PER (UR) | 36849527 |
| --- | --- | --- | --- | --- | --- | --- | --- | --- | --- | --- | --- | --- |
| 52 | *KCNB1*  NM_004975.4 | c.935G>A | p.Arg312His | AD | PS3, PS2, PM1, PM2, PP2, PP3 | 2 y | FTS, AS | — | N | CBZ (R), PHB (PR), TPM (R) | VPA (UR) | 31600826, 28806457 |
| 58 | *ATP6V0C*  NM_001694.4 | c.263+2T>G | p.? | AD | PVS1_Strong, PS2, PM2 | 6 mo | GTC | *De novo* | N | VPA (R) | PER (SE) | — |
| 59 | *CLCN2*  NM_004366.6 | c.2098_2099del | p.Lys700Glufs*35 | AD | PVS1, PM2 | 7 mo | FTS | — | Y | LEV (R), TPM (UR), LTG (R) | CBZ (UR), VPA (UR) | — |
| 60 | *TBC1D24* NM_001199107.2 | c.1271T>G  c.1499C>T | p.Phe424Cys  p.Ala500Val | AR | PM2, PP3_Moderate, PM3  PM2, PM3, PM5, PP3_Very strong | 4 mo | FTS, GC | Maternal  Paternal | N | CBZ (R), PER (R), PHT (R) | LEV (UR), TPM (SE) | 30108545, 31257402, 31112829, 33333793, 30945278 |
| 62 | *AFF3*  NM_001386135.1 | c.697G>A | p.Ala233Thr | AD | PS2, PM1, PM2, PP3_Strong | 7 mo | GTC, GT | — | N | CLZ (UR), LEV (R), PHB (R) | — | 31388108, 33961779 |
| 63 | *SCN1A*  NM_001165963.4 | c.3724_3725dup | p.Asp1243Leufs*28 | AD | PVS1, PM2, PP2 | 2 mo | FTS, GT | — | N | CLB (R), LEV (R), TPM (R) | PHT (A) | **—** |
| 64 | *STXBP1* NM_001032221.6 | c.1277T>C | p.Leu426Pro | AD | PS2, PM2, PM5, PP2, PP3_Strong | 10 y | FTS, FTS | *De novo* | N | LEV (R) | — | 26865513 |
| 65 | *KIF1A*  NM_001244008.2 | c.640A>G | p.Ser214Gly | AD | PS2, PM1, PM2, PP2, PP3 | 1 y 7 mo | FTS | *De novo* | Y | CLB (R), TPM (PR), VPA (R) | LEV (PR), PHB (UR) | — |
| 66 | *SCN2A*  NM_001040142.2 | c.3703C>T | p.Arg1235* | AD | PVS1, PM2 | 2 y | GT, MS | — | N | TPM (R), VPA (R) | PHB (UR), PHT (R) | — |
| 67 | *PCDH19* NM_001184880.2 | c.1425_1426del | p.Ser476Cysfs*46 | XD | PVS1, PM2 | 11 mo | GT, GTC | — | Y | CLB (R), PHB (R), PHT (R), TPM (PR), VPA (PR) | — | — |
| 68 | *ANKRD11*  NM_013275.6 | c.5895del | p.Thr1966Profs*6 | AD | PVS1, PM2 | 6 mo | GT, MS, AS | — | Y | TPM (R) | CBZ (UR) | — |
| 71 | *STXBP1* NM_001032221.6 | c.1227_1229del | p.Leu410del | AD | PM1, PM2, PM4, PP2 | 3 d | MS, GT, FTS, Other | — | N | LEV (R), TPM (R) | — | — |
| 74 | *SCN1A*  NM_001165963.4 | c.971A>G | p.His324Arg | AD | PM1, PM2, PP2, PP4 | 6 mo | GTC | — | N | CLZ (R), LEV (R), VPA (R) | TPM (SE) | — |
| 76 | *ATP1A2*  NM_000702.4 | c.2438T>A | p.Met813Lys | AD | PS2, PM1, PM2, PP2, PP3_Strong | 1 y 2 mo | FTS | — | N | LEV (R) | CBZ (UR), PHB (R, SE), PHT (UR), VPA (A) | 33578253 |
| 78 | *KCNQ2*  NM_172107.4 | c.1657C>T | p.Arg553Trp | AD | PS2, PM1, PM2, PP2, PP3_Moderate | 9 d | GT | — | N | CBZ (R) | LEV (R), PHB (R), TPM (R) | 28926830, 27535030 |
| 83 | *MBD5*  NM_001378120.1 | c.2313_2314insTT | p.Asn772Leufs*13 | AD | PVS1, PM2, PS2 | 1 y 9 mo | FTS, GT, MA | *De novo* | Y | LEV (UR), VPA (R) | — | — |
| 84 | *SCN1A*  NM_001165963.4 | c.1029-1G>A | p.? | AD | PVS1, PM2 | 3 mo | FTS, Abs | — | N | CLB (R), LCS (PR), LEV (PR), PHB (R), TPM (R), LTG (UR) | CBZ (PR), PER (UR), PHT (PR), VPA (SE) | — |
| 85 | *SCN1A*  NM_001165963.4 | c.2134C>T | p.Arg712* | AD | PVS1, PS2, PM2 | 7 mo | MS, GTC | — | N | CLB (R), PHB (R), VPA (R), LTG (R) | LEV (UR) | 32056211, 28387369 |
| 86 | *KCNA2*  NM_004974.4 | c.988C>G | p.Leu330Val | AD | PM2, PM5, PP2, PP3_Moderate | 4 mo | GT | — | N | LEV (R), VPA (R) | PHB (UR) | — |
| 88 | *DEAF1*  NM_021008.4 | c.684C>G | p.Ile228Met | AD | PS2, PM1, PM2, PP3_Moderate | 5 y | GTC, Abs, MS, AS, FTS | *De novo* | N | CLB (R), PHB (R), VPA (R) | PHT (UR) | — |
| 89 | *LZTR1*  NM_006767.4 | c.731C>T | p.Ser244Phe | AD | PS2, PM1, PM2, PP3 | 9 mo | FTS, GT | *De novo* | Y | TPM (R), VPA (R) | LEV (UR) | — |
| 90 | *NDP*  NM_000266.4 | c.211del | p.Gln71Argfs*33 | XD | PVS1_Strong, PM2 | 3 y | GTC, Abs, MS, FC | — | N | LEV (PR), PER (R), PHT (R), TPM (PR), VPA (R) | PHB (UR) | — |
| 91 | *TANGO2*  NM_152906.7 | c.460G>A | p.Gly154Arg | AR  (homozygous) | PM3_Strong, PM2, PP3_Moderate, PP4 | 4 y | GT | Parental | N | VPA (R) | — | 26805781 |
|  |  |  |  |  |  |  |  |  |  |  |  |  |
| **SUPPLEMENTARY TABLE 1 (CONTINUED)** REPRESENTATIVE PATHOGENIC AND LIKELY PATHOGENIC VARIANTS IDENTIFIED BY WHOLE EXOME SEQUENCING (WES) | | | | | | | | | | | | |

| **Case ID** | **Gene** | **Variant** | **Protein** | **MOI** | **ACMG classificationa** | **AAO** | **Seizure type** | **Inheritance pattern** | **Seizure free** | **Current medications** | **Past medications** | **Previous publication (PMID)** |
| --- | --- | --- | --- | --- | --- | --- | --- | --- | --- | --- | --- | --- |

| 95 | *GLUL*  NM_001033044.4 | c.604T>C | p.Trp202Arg | AD | PM2, PP3_Moderate, PS2 | 2 mo | FTS, ES | *De novo* | N | PHB (R), VGB (R) | — | — |
| --- | --- | --- | --- | --- | --- | --- | --- | --- | --- | --- | --- | --- |
| 97 | *HUWE1*  NM_031407.7 | c.3985G>C | p.Gly1329Arg | XLD | PS2, PM2, PP2, PP3_Moderate | 2 mo | Other, GT, FTS | *De novo* | N | LEV (R), TPM (R), VPA (R) | CLZ (SE), PHT (UR) | — |
| 102 | *SETD1B* NM_001353345.2 | c.5842G>A | p.Glu1948Lys | AD | PS2, PM1, PM2, PP2, PP3_Moderate | 3 y | MS, Abs | — | Y | PER (R), VPA (UR) | CLB (UR), LEV (UR), LTG (UR) | 34345025 |
| 104 | *SCN1A*  NM_001165963.4 | c.1837C>T | p.Arg613* | AD | PVS1, PS2, PM2, PP4 | 3 mo | FC, FTS | — | N | LEV (R), PHB (R) | PHT (UR) | 17054684, 16458823 |
| 105 | *NAA15*  NM_057175.5 | c.2179del | p.Ser727Leufs*8 | AD | PVS1, PM2 | 4 y | GTC | — | Y | LEV (R) | — | — |
| 110 | *ATP7A*  NM_000052.7 | c.2187G>A | p.Trp729* | XLR  (hemizygous) | PVS1, PM2, PP4 | 3 mo | ES, GTC | — | N | LEV (R), VGB (R) | PHT (UR) | — |
| 111 | *UBA5*  NM_024818.6 | c.169A>G  c.721G>T | p.Met57Val  p.Glu241* | AR | PS3, PM2, PM3  PVS1, PM2, PM3 | 5 mo | ES, MS, FTS | Maternal  Paternal | N | LEV (PR), VGB (R) | — | 27545681, 29663568, 30078785 |
| 115 | *SCN1A*  NM_001165963.4 | c.4507G>A | p.Glu1503Lys | AD | PM1, PM2, PP2, PP3_Moderate | 4 mo | GTC, FTS | — | N | VPA (R) | LEV (SE), PHB (SE) | 23195492, 19783390, 30868116 |
| 117 | *OTUD7A* NM_001382637.1 | c.2044_2087del | p.Asp682Hisfs*188 | AR  (homozygous) | PVS1_Strong, PM2 | 5 y 11 mo | Abs | — | Y | CLZ (R), VPA (R), LTG (R) | TPM (UR) | 30108545, 31257402, 31112829, 33333793, 30945278 |
| 118 | *KCNH5*  NM_139318.5 | c.980G>A | p.Arg327His | AD | PS2, PS3, PM2, PM5, PP3 | 5 mo | FC | — | Y | CBZ (R), PER (R) | LEV (UR), PHB (UR), PHT (SE) | 23647072, 35874597, 36307226, 24133262 |
| 120 | *PACS1*  NM_018026.4 | c.607C>T | p.Arg203Trp | AD | PS2, PM2, PP3_Strong, PP2 | 7 d | MS, Other | — | N | LEV (R), PHT (PR) | PHB (UR) | 23159249, 25522177, 26842493, 28111752 |
| 121 | *UBA5*  NM_024818.6 | c.169A>G  c.164G>A | p.Met57Val  p.Arg55His | AR | PM3, PM2, PP1, PS3  PM3, PM2, PP1, PS3 | 2 mo | ES, GTC, MS, FTS | — | N | VPA (PR), VGB (R), LTG (R), KTD (R) | CLB (SE), LEV (UR), PER (UR), PHB (UR), TPM (UR) | 29663568, 27926783, 27545681 |
| 122 | *UBA5*  NM_024818.6 | c.169A>G  c.164G>A | p.Met57Val  p.Arg55His | AR | PM3, PM2, PP1, PS3  PM3, PM2, PP1, PS3 | 2 mo | GT, GC | — | N | CLZ (PR), TPM (R), VPA (PR) | — | 29663568, 27926783, 27545681 |
| 123 | *GLDC*  NM_000170.3 | c.253_255+13del  c.2408C>T | —  p.Ala803Val | AR | PP3, PM2, PP4, PM3  PM2, PP3_Moderate, PP4, PM3 | 3 mo | ES | Paternal  Maternal | N | LEV (UR), PHB (UR), TPM (UR), VGB (R) | — | 23647072, 35874597, 36307226, 24133262 |

**Medication:** CBD, cannabidiol; CBZ, carbamazepine; CLB, clobazam; CLZ, clonazepam; FBM, felbamate; FCM, cenobamate; GBP, gabapentin; KTD, ketogenic diet; LCS, lacosamide; LEV, levetiracetam; LTG, lamotrigine; OXC, oxcarbazepine; PER, perampanel; PHB, phenobarbital; PHT, phenytoin; PNL, prednisolone; RUF, rufinamide; STM, stiripentol; TPM, topiramate; VGB, vigabatrin; VPA, valproate (valproic acid); ZNS, zonisamide. Treatment-response codes after each medication: A, aggravation; PR, partial response; R, response; UR, unresponsive.
**Seizure type:** Abs, absence seizure; AS, atonic seizure; ES, epileptic spasm; FC, focal to bilateral tonic-clonic seizure; FTS, focal seizure (subtypes encountered: focal impaired-awareness nonmotor, focal aware nonmotor, focal clonic, focal tonic); GC, generalized clonic seizure; GT, generalized tonic seizure; GTC, generalized tonic-clonic seizure; MA, myoclonic-atonic seizure; MS, myoclonic seizure; MTC, myoclonic-tonic-clonic seizure.
a Variants were interpreted according to the American College of Medical Genetics and Genomics / Association for Molecular Pathology guidelines (PMID 25741868); disease-specific expert-panel specifications were applied when available.
**Abbreviations:** AAO, age at seizure onset; ACMG, American College of Medical Genetics and Genomics; AD, autosomal dominant; AMP, Association for Molecular Pathology; AR, autosomal recessive; d, day(s); LP, likely pathogenic; mo, month(s); MOI, mode of inheritance; *N*, no; P, pathogenic; PMID, PubMed identifier; VUS, variant of uncertain significance; WES, whole-exome sequencing; XLD, X-linked dominant; XLR, X-linked recessive; Y, yes; y, year(s).
